# Supplementary material for: Association Between Awake Tracheal Intubation and Peri-Intubation Events in Critically Ill Patients: A Single-Center Retrospective Cohort Study
Source: Research Square preprint supplement (doi:10.21203/rs.3.rs-7942044/v1), 2025-11-10
Supplement: Supplementary file 1 [file 1bd54c82443cc0a0e4c75d97.docx]

Table S3A. Entropy balancing (ATE) diagnostics

| Outcome | Risk for ATI (weighted) | Risk for GA (weighted) | Risk difference (weighted) | Risk ratio (weighted) |
| --- | --- | --- | --- | --- |
| complication | 20.5% (6.2%–36.0%) | 55.8% (49.9%–61.8%) | −35.3% (−51.3%–−19.8%) | 0.37 (0.10–0.65) |
| hypotension | 20.5% (6.2%–36.0%) | 47.1% (41.2%–53.0%) | −26.6% (−42.5%–−10.9%) | 0.44 (0.13–0.76) |
| hypoxemia | 0.5% (0.0%–2.6%) | 16.6% (12.5%–21.3%) | −16.1% (−20.9%–−11.7%) | 0.03 (0.00–0.17) |
| mort28 | 23.7% (12.2%–37.8%) | 18.2% (14.0%–22.5%) | +5.5% (−6.7%–19.9%) | 1.30 (0.66–2.18) |

Table S3B. Entropy balancing (ATE) diagnostics with ESS.

| Method | ESS_overall | ESS_treat1 | ESS_treat0 |
| --- | --- | --- | --- |
| Entropy balancing ATE | 316.5622 | 32.38946 | 289.7157 |

**Notes.** Entropy balancing reweighting targeting the ATE with exact mean balance on prespecified covariates. Risks, risk differences (Awake − GA), and risk ratios are estimated in a survey-weighted design. 95% bootstrap CIs from 1,000 resamples with reweighting in each iteration. ESS is the effective sample size from analysis weights overall and by group.
