# Supplementary material for: Association Between Awake Tracheal Intubation and Peri-Intubation Events in Critically Ill Patients: A Single-Center Retrospective Cohort Study
Source: Research Square preprint supplement (doi:10.21203/rs.3.rs-7942044/v1), 2025-11-10
Supplement: Supplementary file 2 [file 489b45386b05abe2e5b0a5ef.docx]

Table 1. Baseline characteristics by exposure (with standard mean difference)

| Characteristics | Awake tracheal intubation (n, %, or median [IQR]) | General anesthesia (n, %, or median [IQR]) | Std. mean diff. |
| --- | --- | --- | --- |
| Age | 63.0 [49.8–71.5] | 67.0 [56.0–77.0] | -0.29 |
| Male | 31 (64.6%) | 224 (76.2%) | -0.26 |
| Height (cm) | 164.5 [159.8–168.2] | 168.0 [159.0–172.0] | -0.27 |
| Weight (kg) | 61.5 [49.5–71.0] | 66.0 [58.0–78.0] | -0.45 |
| BMI | 23.3 [18.6–26.2] | 24.1 [21.8–26.7] | -0.45 |
| SOFA | 5.5 [4.0–7.0] | 5.0 [3.0–6.0] | 0.34 |
| APACHE II | 15.0 [11.0–20.2] | 15.0 [11.0–19.0] | 0.09 |
| **Indication for tracheal intubation** |  |  |  |
| respiratory failure | 39 (81.2%) | 257 (87.4%) | -0.18 |
| shock | 9 (18.8%) | 24 (8.2%) | 0.36 |
| airway protection | 5 (10.4%) | 16 (5.4%) | 0.21 |
| **Vital signs at the start of tracheal intubation (time zero)** |  |  |  |
| Systolic blood pressure (mmHg) | 118.0 [105.0–129.2] | 139.5 [120.0–160.8] | -0.68 |
| Heart rate (bpm) | 111.0 [100.0–123.8] | 94.5 [81.0–113.8] | 0.55 |
| SpO2 (%) | 94.5 [89.0–98.0] | 96.0 [92.0–99.0] | -0.37 |
| **Agent used for induction** |  |  |  |
| Propofol | NA | 179 (60.9%) |  |
| dose of Propofol (mg) | NA | 50.0 [0.0–100.0] |  |
| Midazolam | NA | 117 (39.8%) |  |
| dose of Midazolam (mg) | NA | 0.0 [0.0–4.0] |  |
| Rocuronium | NA | 219 (74.5%) |  |
| dose of Rocuronium (mg) | NA | 50.0 [0.0–100.0] |  |
| Fentanyl | 13 (27.1%) | 249 (84.7%) | -1.36 |
| dose of Fentanyl (mcg) | 0.0 (0.0–35.0) | 100.0 [100.0–200.0] | -1.34 |

Notes: Continuous variables are shown as median [IQR], and categorical variables as n (%). Standardized mean differences (SMD) were computed as the difference in means divided by the pooled SD for continuous variables, and as the difference in proportions divided by √{p(1−p)} for binary variables. SOFA and APACHE II were assessed within 24 hours from ICU admission.
