# Supplementary material for: Association Between Awake Tracheal Intubation and Peri-Intubation Events in Critically Ill Patients: A Single-Center Retrospective Cohort Study
Source: Research Square preprint supplement (doi:10.21203/rs.3.rs-7942044/v1), 2025-11-10
Supplement: Supplementary file 3 [file 74f2246cdca652b70b0021b4.docx]

Table S6. E-values for robustness to unmeasured confounding (risk ratio scale)

| Outcome | RR | 95% CI (L) | 95% CI (U) | Method | E-value (point) | E-value (CI) |
| --- | --- | --- | --- | --- | --- | --- |
| cardiac_arrest |  |  |  | g-comp (standardized) |  |  |
| complication | 0.305 | 0.120 | 0.534 | g-comp (standardized) | 6.013 | 3.147 |
| complication | 0.325 | 0.180 | 0.584 | modified Poisson (robust) | 5.610 | 2.815 |
| complication | 0.333 | 0.125 | 0.591 | PSM (ATT) | 5.449 | 2.775 |
| complication | 0.368 | 0.104 | 0.645 | Entropy balancing (ATE) | 4.880 | 2.472 |
| hypotension | 0.352 | 0.136 | 0.614 | g-comp (standardized) | 5.127 | 2.640 |
| hypotension | 0.380 | 0.211 | 0.687 | modified Poisson (robust) | 4.699 | 2.272 |
| hypotension | 0.364 | 0.143 | 0.700 | PSM (ATT) | 4.944 | 2.212 |
| hypotension | 0.436 | 0.129 | 0.762 | Entropy balancing (ATE) | 4.015 | 1.954 |
| hypoxemia | 0.139 | 0.000 | 0.381 | g-comp (standardized) | 13.910 | 4.686 |
| hypoxemia | 0.135 | 0.022 | 0.813 | modified Poisson (robust) | 14.330 | 1.760 |
| hypoxemia | 0.167 | 0.000 | 0.500 | PSM (ATT) | 11.477 | 3.414 |
| hypoxemia | 0.031 | 0.000 | 0.172 | Entropy balancing (ATE) | 64.530 | 11.127 |
| mort28 | 1.660 | 0.957 | 2.558 | g-comp (standardized) | 2.707 | 1.000 |
| mort28 | 1.772 | 1.107 | 2.836 | modified Poisson (robust) | 2.942 | 1.452 |
| mort28 | 1.625 | 0.667 | 4.250 | PSM (ATT) | 2.633 | 1.000 |
| mort28 | 1.304 | 0.663 | 2.177 | Entropy balancing (ATE) | 1.934 | 1.000 |

**Notes.** E-values quantify the minimum strength of association that an unmeasured confounder would need with both exposure and outcome, beyond measured covariates, to explain away the observed association. “Point” is computed from the point estimate on the risk-ratio scale; “CI” uses the confidence limit closest to the null (set to 1 when the CI crosses 1).
