# Supplementary material for: Association Between Awake Tracheal Intubation and Peri-Intubation Events in Critically Ill Patients: A Single-Center Retrospective Cohort Study
Source: Research Square preprint supplement (doi:10.21203/rs.3.rs-7942044/v1), 2025-11-10
Supplement: Supplementary file 4 [file 7ff30fde9f4771f5d5d48049.docx]

Table S5. Cardiac arrest within 30 minutes (rare event, exact methods)

| Group | Events / N | Risk (%) | 95% CI |
| --- | --- | --- | --- |
| ATI | 1 / 48 | 2.1 | 0.05 to 11.07 |
| GA | 1 / 294 | 0.3 | 0.01 to 1.88 |

Risk difference (Awake − GA): +1.74 percentage points; 95% CI −0.41 to 10.59

Notes: For very rare outcomes, group risks are shown with exact Clopper–Pearson 95% CIs. The risk difference uses Newcombe score-based 95% CIs.
