# Supplementary material for: Association Between Awake Tracheal Intubation and Peri-Intubation Events in Critically Ill Patients: A Single-Center Retrospective Cohort Study
Source: Research Square preprint supplement (doi:10.21203/rs.3.rs-7942044/v1), 2025-11-10
Supplement: Supplementary file 5 [file c1828a1b4e46f9df1c41f65a.docx]

Table S4. Modified Poisson regression with robust standard errors

| Outcome | RR (modified Poisson), [95% CI] |
| --- | --- |
| Peri-intubation events (composite) | 0.32 [0.18–0.58] |
| Hypotension | 0.38 [0.21–0.69] |
| Hypoxemia | 0.13 [0.02–0.81] |
| 28-day mortality | 1.77 [1.11–2.84] |

**Notes.** Modified Poisson regression with log link and robust (sandwich) standard errors adjusted for prespecified covariates. Entries are adjusted risk ratios with 95% confidence intervals. This model is complementary to the primary g-computation analysis and estimates marginal risk ratios on the probability scale.
