# Supplementary material for: Association Between Awake Tracheal Intubation and Peri-Intubation Events in Critically Ill Patients: A Single-Center Retrospective Cohort Study
Source: Research Square preprint supplement (doi:10.21203/rs.3.rs-7942044/v1), 2025-11-10
Supplement: Supplementary file 6 [file ce042e57a9be2f29882a6395.docx]

## Table S1. Covariate balance before and after adjustment

| Covariate | |SMD| Unadjusted | |SMD| PSM 1:1 (ATT) | |SMD| EB (ATE) |
| --- | --- | --- | --- |
| age | 0.287 | 0.102 | 0 |
| sex | 0.113 | 0.065 | 0 |
| BMI | 0.446 | 0.245 | 0 |
| SOFA | 0.341 | 0.186 | 0 |
| APACHE | 0.088 | 0.061 | 0 |
| respiratory_failure | 0.062 | 0.022 | 0 |
| shock | 0.106 | 0.000 | 0 |
| distance |  | 0.001 |  |

Notes: Entries are absolute standardized mean differences (|SMD|). PSM used 1:1 nearest-neighbor matching with a 0.25 SD caliper on the logit of the propensity score targeting the ATT. Entropy balancing targeted the ATE and enforces exact mean balance on prespecified covariates.
