# Supplementary material for: Association Between Awake Tracheal Intubation and Peri-Intubation Events in Critically Ill Patients: A Single-Center Retrospective Cohort Study
Source: Research Square preprint supplement (doi:10.21203/rs.3.rs-7942044/v1), 2025-11-10
Supplement: Supplementary file 7 [file e83c50314596353f40ac4cfd.docx]

Table 2. Adjusted risks and effect estimates using g-computation analysis

| Outcome | Adjusted Risk, ATI (%) [95% CI] | Adjusted Risk, GA (%) [95% CI] | Risk difference (pp) [95% CI] | Risk ratio [95% CI] | NNT/NNH |
| --- | --- | --- | --- | --- | --- |
| Peri-intubation events (composite) | 17.0% [6.8%–29.6%] | 55.8% [49.8%–61.7%] | −38.8% [−50.8%–−25.1%] | 0.30 [0.12–0.53] | NNT 3 (4–2) |
| Hypotension | 16.5% [6.5%–28.5%) | 47.0% [41.4%–52.9%] | −30.5% [−42.6%–−18.0%] | 0.35 [0.14–0.61] | NNT 3 (6–2) |
| Hypoxemia | 2.3% [0.0%–6.0%] | 16.8% [12.7%–21.3%] | −14.4% [−20.2%–−9.1%] | 0.14 [0.00–0.38] | NNT 7 (11–5) |
| 28-day mortality | 30.1% [17.6%–42.7%] | 18.1% [13.9%–22.4%] | +11.9% [−0.8%–25.2%] | 1.66 [0.96–2.56] | NNH 8 |

**Notes.** Adjusted risks estimated via g-computation (logistic regression with marginal standardization). Covariates: age, sex, BMI, SOFA, APACHE II, and indication (respiratory failure, shock). RD (ATI−GA) is in percentage points; negative values favor ATI. 95% CIs from nonparametric patient-level bootstrap (1,000 replicates; percentile method). NNT/NNH is 1/|RD| and shown only when the CI does not cross 0. Outcomes assessed within 30 minutes from intubation start. Abbreviations: ATI=awake tracheal intubation; GA=general anesthesia; RD=risk difference; RR=risk ratio; CI=confidence interval; NNT/NNH=number needed to treat/harm.
