# Supplementary material for: Association Between Awake Tracheal Intubation and Peri-Intubation Events in Critically Ill Patients: A Single-Center Retrospective Cohort Study
Source: Research Square preprint supplement (doi:10.21203/rs.3.rs-7942044/v1), 2025-11-10
Supplement: Supplementary file 8 [file fe1a0b59a016804c9cbc5cdf.docx]

Table S2. Propensity score matching (1:1) diagnostics with ESS

| Outcome | Risk for ATI | Risk for GA  (%) [95% CI] | Risk difference  (%) [95% CI] | Risk ratio  [95% CI] | ESS  all | ESS  ATI | ESS  GA |
| --- | --- | --- | --- | --- | --- | --- | --- |
| Peri-intubation events (composite) | 8.7% (3.7%–15.1%) | 26.1% (20.0%–36.7%) | −17.4% (−29.4%–−9.2%) | 0.33 (0.12–0.59) | 92 | 46 | 46 |
| hypotension | 8.7% (3.7%–15.1%) | 23.9% (16.4%–33.3%) | −15.2% (-25.6%–−5.7%) | 0.36 (0.14–0.70) | 92 | 46 | 46 |
| hypoxemia | 1.1% (0.0%–2.3%) | 6.5% (1.8%–13.0%) | −5.4% (−12.9%–−1.1%) | 0.17 (0.00–0.50) | 92 | 46 | 46 |
| 28-day  mortality | 14.1% (7.1%–20.5%) | 8.7% (3.2%–15.9%) | +5.4% (−4.1%–13.8%) | 1.62 (0.67–4.25) | 92 | 46 | 46 |

**Notes.** 1:1 nearest-neighbor propensity score matching without replacement using a caliper of 0.25 SD on the logit of the propensity score, estimand is ATT. Reported values are weighted (matched-sample) risks, risk differences (Awake − GA), and risk ratios with 95% bootstrap CIs (1,000 resamples; matching repeated per resample). ESS denotes effective sample size, computed as for all units and by treatment group.
